# Supplementary material
Source: Research Square preprint supplement (doi:10.21203/rs.3.rs-9241891/v1)
Supplement: Supplementary file 1 [file e9b4132bc8e699b96584c692.docx]

**Supplementary Information**

**Probiotics and Antimicrobial Proteins**

**Online Resource 1**

***Lactiplantibacillus plantarum* B isolated from breast milk improves functional properties and increases bioactive ingredients related to antihypertensive effects in fermented buffalo milk in vitro**

Xushan Yanga, Tiemin Jianga,*, Huanzhao Lua, Yuying Lia, Siting Chena, Zhenyu Chena, Fangping Chenb and Aiping Shic

a Guilin University of Technology, College of Chemistry and Bioengineering, Guilin, 541004, China

b Guilin Yiwei Quantum Technology Co. Ltd., Guilin, 541010, China

c Guangxi Royal Dairy Co. Ltd., Nanning , 530007, China

***Correspondence to:**

Tiemin Jiang

Guilin University of Technology, No. 319, Yanshan Street 541006, Yanshan District, Guilin, China

Phone: +86-18278399450;

E-mail: [jtm@glut.edu.cn](mailto:chenlijun@sanyuan.com.cn)

**Table 1** Abundance (mean of peak area, × 106) of metabolites that were significantly different between raw buffalo milk and fermented milks produced with *L. plantarum* B, a traditional yogurt starter, or both

| Metabolite | Superclass | Class | Retention time (s) | m/z | Milk | PFM | BFM | TFM |  | FDR-adjusted p-value | Tukey’s HSD |
| --- | --- | --- | --- | --- | --- | --- | --- | --- | --- | --- | --- |
| Glycitein | Phenylpropanoids and polyketides | Isoflav-2-enes | 347.3 | 283.0685 | 3,357,447.27 | 583,432.62 | 1,212,475.72 | 608,550.14 | 1,440,476.44 | 4.34E-15 | Milk-BFM; PFM-BFM; TFM-BFM; PFM-Milk; TFM-Milk |
| 2',4'-Dihydroxyacetophenone | Benzenoids | Benzene and substituted derivatives | 598.3 | 150.9971 | 295,670,528.95 | 53,803,891.95 | 212,114,971.65 | 65,892,384.26 | 156,870,444.20 | 6.9E-13 | Milk-BFM; PFM-BFM; TFM-BFM; PFM-Milk; TFM-Milk |
| dTMP | Nucleosides, nucleotides, and analogues | Pyrimidine nucleotides | 271.7 | 321.0435 | 3,908,591.95 | 299,089.23 | 2,134,302.82 | 317,761.63 | 1,664,936.41 | 1.27E-11 | Milk-BFM; PFM-BFM; TFM-BFM; PFM-Milk; TFM-Milk |
| Creatinine | Organic acids and derivatives | Amino acids, peptides, and analogues | 104.5 | 112.9841 | 3,421,151.73 | 4,049,369.87 | 5,112,839.42 | 4,231,789.90 | 4,203,787.73 | 7.07E-11 | Milk-BFM; PFM-BFM; TFM-BFM; PFM-Milk; TFM-Milk |
| (S)-beta-Tyrosine | Organic acids and derivatives | Amino acids, peptides, and analogues | 90.6 | 182.0813 | 440,766.31 | 7,175,741.24 | 2,601,554.34 | 8,533,385.35 | 4,687,861.81 | 1.23E-10 | Milk-BFM; PFM-BFM; TFM-BFM; PFM-Milk; TFM-Milk |
| dGMP | Nucleosides, nucleotides, and analogues | Purine nucleotides | 523.9 | 347.1709 | 849,013.26 | 45,761,202.19 | 29,877,290.48 | 34,046,676.46 | 27,633,545.60 | 4.22E-10 | Milk-BFM; PFM-BFM; PFM-Milk; TFM-Milk; TFM-PFM |
| Cellobiose | Organic oxygen compounds | Carbohydrates and carbohydrate conjugates | 51 | 341.1085 | 67,436,255.81 | 753,847,332.52 | 460,511,575.00 | 797,733,871.38 | 519,882,258.68 | 4.23E-10 | Milk-BFM; PFM-BFM; TFM-BFM; PFM-Milk; TFM-Milk |
| N-Methyl-D-aspartic acid | Organic acids and derivatives | Amino acids, peptides, and analogues | 277.7 | 145.9988 | 44,194,049.36 | 15,281,361.74 | 43,446,334.14 | 10,986,282.47 | 28,477,006.93 | 1.18E-09 | PFM-BFM; TFM-BFM; PFM-Milk; TFM-Milk |
| Uric acid | Organoheterocyclic compounds | Purines and purine derivatives | 48.1 | 167.0204 | 237,099,014.38 | 87,737,025.99 | 175,668,396.83 | 89,615,618.37 | 147,530,013.89 | 1.3E-09 | Milk-BFM; PFM-BFM; TFM-BFM; PFM-Milk; TFM-Milk |
| Isovaleric acid | Lipids and lipid-like molecules | Lipid/Fatty acids and conjugates | 148.3 | 102.0343 | 4,002,109.23 | 38,968,330.14 | 11,174,655.90 | 40,288,296.24 | 23,608,347.87 | 1.36E-09 | PFM-BFM; TFM-BFM; PFM-Milk; TFM-Milk |
| Phosphorylcholine | Organic nitrogen compounds | Quaternary ammonium salts | 51.2 | 184.0732 | 265,782,243.88 | 290,004,576.67 | 675,126,969.07 | 315,607,658.77 | 386,630,362.10 | 1.36E-09 | Milk-BFM; PFM-BFM; TFM-BFM |
| Estragole | Benzenoids | Phenol ethers | 666.6 | 148.087 | 6,053,749.77 | 40,853,899.45 | 11,120,311.82 | 49,426,971.50 | 26,863,733.13 | 2.12E-09 | PFM-BFM; TFM-BFM; PFM-Milk; TFM-Milk |
| N-Acetylglutamic acid | Organic acids and derivatives | Amino acids, peptides, and analogues | 56.2 | 189.0869 | 5,299,675.73 | 57,968,038.49 | 15,638,928.33 | 64,769,611.47 | 35,919,063.50 | 5.02E-09 | PFM-BFM; TFM-BFM; PFM-Milk; TFM-Milk |
| Apigenin | Phenylpropanoids and polyketides | Phenols/Polyphenols/Flavonoids | 343.4 | 269.045 | 679,757.65 | 347,493.08 | 821,274.91 | 259,218.53 | 526,936.04 | 1.29E-08 | Milk-BFM; PFM-BFM; TFM-BFM; PFM-Milk; TFM-Milk |
| O-Acetyl-L-homoserine | Organic acids and derivatives | non-proteinogenic alpha-amino acid | 55.6 | 162.0763 | 8,857,658.86 | 92,670,471.77 | 27,607,379.62 | 97,762,154.15 | 56,724,416.10 | 1.72E-08 | PFM-BFM; TFM-BFM; PFM-Milk; TFM-Milk |
| Acetylcholine | Organic nitrogen compounds | Quaternary ammonium salts | 54.9 | 146.1174 | 384,068,295.52 | 1,311,514,042.15 | 761,711,068.75 | 1,456,656,519.67 | 978,487,481.52 | 1.79E-08 | Milk-BFM; PFM-BFM; TFM-BFM; PFM-Milk; TFM-Milk |
| 1-palmitoylglycerophosphocholine | Lipids and lipid-like molecules | Lipid/Glycerophospholipids | 490.2 | 496.3401 | 106,588,023.66 | 3,421,615.01 | 61,120,939.47 | 3,733,919.85 | 43,716,124.50 | 1.96E-08 | Milk-BFM; PFM-BFM; TFM-BFM; PFM-Milk; TFM-Milk |
| 1-Aminocyclopropanecarboxylic acid | Organic acids and derivatives | Amino acids, peptides, and analogues | 573.2 | 101.0713 | 1,184,579.35 | 45,041,420.57 | 21,683,575.06 | 54,789,419.86 | 30,674,748.71 | 4.56E-08 | Milk-BFM; PFM-BFM; TFM-BFM; PFM-Milk; TFM-Milk |
| Pipecolic acid | Organic acids and derivatives | Amino acids, peptides, and analogues | 55.8 | 130.0863 | 265,190,944.13 | 84,805,794.10 | 115,730,957.86 | 97,102,249.84 | 140,707,486.48 | 5.28E-08 | Milk-BFM; PFM-Milk; TFM-Milk |
| 2-Pyrocatechuic acid | Benzenoids | Benzene and substituted derivatives | 215.1 | 153.018 | 84,606,355.09 | 50,958,234.08 | 98,467,973.85 | 47,268,758.49 | 70,325,330.38 | 6.25E-08 | PFM-BFM; TFM-BFM; PFM-Milk; TFM-Milk |
| trans-1,2-Cyclohexanediol | Organic oxygen compounds | Alcohols and polyols | 665.1 | 115.9198 | 61,853,957.35 | 205,253,651.52 | 206,853,652.35 | 260,596,609.05 | 183,639,467.57 | 7.86E-08 | Milk-BFM; TFM-BFM; PFM-Milk; TFM-Milk; TFM-PFM |
| Dimethylglycine | Organic acids and derivatives | Amino acids, peptides, and analogues | 49.7 | 104.1068 | 728,069,687.65 | 4,313,800,104.17 | 1,551,098,358.50 | 7,196,108,326.50 | 3,447,269,119.20 | 0.000000135 | PFM-BFM; TFM-BFM; PFM-Milk; TFM-Milk; TFM-PFM |
| Pelargonic acid | Lipids and lipid-like molecules | Lipid/Fatty acids and conjugates | 556.5 | 157.1226 | 11,547,364.38 | 15,671,823.66 | 53,730,595.16 | 13,306,994.12 | 23,564,194.33 | 0.000000149 | Milk-BFM; PFM-BFM; TFM-BFM |
| 9,10-Epoxyoctadecenoic acid | Lipids and lipid-like molecules | Lipid/Fatty acids and conjugates | 452.5 | 295.2283 | 234,522.78 | 3,676,175.73 | 3,944,721.97 | 4,598,350.26 | 3,113,442.68 | 0.000000219 | Milk-BFM; PFM-Milk; TFM-Milk |
| 10-Hydroxydecanoic acid | Organic acids and derivatives | Lipid/Fatty acids and conjugates | 345.9 | 189.1485 | 1,714,852.83 | 6,993,776.51 | 5,110,790.88 | 7,280,647.91 | 5,275,017.03 | 0.000000221 | Milk-BFM; PFM-BFM; TFM-BFM; PFM-Milk; TFM-Milk |
| Genistein | Phenylpropanoids and polyketides | Phenols/Polyphenols/Flavonoids | 492.8 | 271.2269 | 14,402,208.58 | 23,492,348.08 | 46,349,876.75 | 15,054,357.09 | 24,824,697.62 | 0.000000286 | Milk-BFM; PFM-BFM; TFM-BFM |
| Norepinephrine | Benzenoids | Phenols/Polyphenols | 76.8 | 168.066 | 4,813,117.47 | 3,194,058.42 | 2,752,184.03 | 3,783,122.07 | 3,635,620.50 | 0.0000012 | Milk-BFM; TFM-BFM; PFM-Milk; TFM-Milk |
| 16-Hydroxy hexadecanoic acid | Lipids and lipid-like molecules | Lipid/Fatty acids and conjugates | 512.6 | 255.2318 | 35,610,382.53 | 6,763,678.05 | 17,237,579.58 | 5,637,071.24 | 16,312,177.85 | 0.00000126 | Milk-BFM; PFM-BFM; TFM-BFM; PFM-Milk; TFM-Milk |
| Palmitoleic acid | Lipids and lipid-like molecules | Lipid/Fatty acids and conjugates | 573.9 | 253.2175 | 27,754,987.17 | 47,014,377.23 | 26,293,470.81 | 51,931,961.14 | 38,248,699.09 | 0.00000129 | PFM-BFM; TFM-BFM; PFM-Milk; TFM-Milk |
| Deoxyuridine | Nucleosides, nucleotides, and analogues | Pyrimidine nucleosides | 576.7 | 228.1961 | 19,513,552.10 | 41,896,695.41 | 5,608,220.27 | 74,449,693.76 | 35,367,040.38 | 0.00000162 | PFM-BFM; TFM-BFM; PFM-Milk; TFM-Milk; TFM-PFM |
| o-Toluate | Benzenoids | Benzene and substituted derivatives | 262.5 | 135.0442 | 250,363.16 | 2,582,727.97 | 2,474,577.23 | 3,417,170.65 | 2,181,209.75 | 0.00000177 | Milk-BFM; PFM-Milk; TFM-Milk |
| Exemestane | Lipids and lipid-like molecules | Lipid/Steroids and steroid derivatives | 488.9 | 296.1763 | 474,597.20 | 456,078.44 | 289,717.96 | 507,048.58 | 431,860.55 | 0.00000248 | Milk-BFM; PFM-BFM; TFM-BFM |
| Kaempferide | Phenylpropanoids and polyketides | Phenols/Polyphenols/Flavonoids | 556.5 | 299.2593 | 43,845,611.12 | 76,061,581.18 | 41,657,250.75 | 83,533,888.15 | 61,274,582.80 | 0.00000248 | PFM-BFM; TFM-BFM; PFM-Milk; TFM-Milk |
| Tridemorph | Organoheterocyclic compounds | Oxazines/Morpholines | 637.1 | 298.3107 | 1,679,822.15 | 58,265,830.48 | 27,619,653.68 | 86,413,636.35 | 43,494,735.66 | 0.00000248 | PFM-BFM; TFM-BFM; PFM-Milk; TFM-Milk; TFM-PFM |
| Oxoglutaric acid | Organic acids and derivatives | Keto acids and derivatives | 42.9 | 146.03 | 36,209,247.65 | 66,952,921.41 | 58,550,179.11 | 69,973,193.43 | 57,921,385.40 | 0.00000258 | Milk-BFM; PFM-Milk; TFM-Milk |
| Homo-L-arginine | Organic acids and derivatives | Amino acids, peptides, and analogues | 380.6 | 187.0436 | 10,587.96 | 3,199,947.00 | 6,903,794.63 | 1,117,021.45 | 2,807,837.76 | 0.00000323 | Milk-BFM; PFM-BFM; TFM-BFM; PFM-Milk |
| Folic acid | Benzenoids | Phenols | 440.5 | 441.2535 | 3,471,471.27 | 173,494.13 | 3,230,361.83 | 198,690.78 | 1,768,504.50 | 0.00000432 | PFM-BFM; TFM-BFM; PFM-Milk; TFM-Milk |
| (S)-1-Phenylethanol | Organic oxygen compounds | Alcohols and polyols | 43 | 123.0407 | 985,027,340.65 | 531,124,726.67 | 548,506,707.62 | 408,466,309.10 | 618,281,271.01 | 0.00000569 | Milk-BFM; PFM-Milk; TFM-Milk |
| Rutin | Phenylpropanoids and polyketides | Phenols/Polyphenols/Flavonoids | 658.8 | 593.158 | 981,165.69 | 12,414,070.51 | 5,171,356.63 | 10,103,660.27 | 7,167,563.28 | 0.0000211 | PFM-BFM; TFM-BFM; PFM-Milk; TFM-Milk |
| 3-Dehydrosphinganine | Lipids and lipid-like molecules | lipid/sphingolipid | 494.4 | 300.2899 | 9,584,119.74 | 14,119,909.45 | 14,085,321.96 | 15,235,296.46 | 13,256,161.91 | 0.0000373 | Milk-BFM; PFM-Milk; TFM-Milk |
| D-Mannose | Organic oxygen compounds | Carbohydrates and carbohydrate conjugates | 172.5 | 181.071 | 16,002,814.56 | 20,103,588.27 | 5,579,552.58 | 19,961,506.74 | 15,411,865.54 | 0.0000614 | Milk-BFM; PFM-BFM; TFM-BFM |
| L-Dopa | Organic acids and derivatives | Amino acids, peptides, and analogues | 204.7 | 180.0656 | 4,503,941.95 | 714,021.42 | 3,070,534.20 | 2,808,299.36 | 2,774,199.23 | 0.000072 | PFM-BFM; PFM-Milk; TFM-Milk; TFM-PFM |
| Hippuric acid | Benzenoids | Benzene and substituted derivatives | 96.7 | 179.0538 | 87,229,405.81 | 313,622,105.00 | 151,258,453.86 | 121,959,476.61 | 168,517,360.32 | 0.0000843 | PFM-BFM; PFM-Milk; TFM-PFM |
| Levonorgestrel | Lipids and lipid-like molecules | Lipid/Steroids and steroid derivatives | 524.4 | 311.2012 | 5,859,519.91 | 8,165,955.45 | 10,138,445.80 | 8,245,460.32 | 8,102,345.37 | 0.000085 | Milk-BFM; PFM-BFM; TFM-BFM; PFM-Milk; TFM-Milk |
| L-Serine | Organic acids and derivatives | Amino acids, peptides, and analogues | 682.3 | 105.0434 | 47,741,402.18 | 7,879,400.45 | 37,254,604.91 | 30,364,990.46 | 30,810,099.50 | 0.00011 | PFM-BFM; PFM-Milk; TFM-Milk; TFM-PFM |
| Phosphoglycolic acid | Organic acids and derivatives | Phosphate esters | 689.3 | 155.9923 | 13,296,711.57 | 291,998,622.82 | 402,404,270.97 | 152,697,444.74 | 215,099,262.53 | 0.00011 | Milk-BFM; TFM-BFM; PFM-Milk |
| Oleoylethanolamide | Organic nitrogen compounds | Amines | 617.2 | 308.2951 | 24,620,676.41 | 48,597,646.64 | 66,099,841.87 | 48,479,681.92 | 46,949,461.71 | 0.000124 | Milk-BFM; PFM-BFM; TFM-BFM; PFM-Milk; TFM-Milk |
| Trigonelline | Alkaloids and derivatives | Alkaloids derived from nicotinic acid | 53.1 | 138.055 | 188,386,694.08 | 88,644,947.37 | 84,858,835.40 | 161,837,311.99 | 130,931,947.21 | 0.000157 | Milk-BFM; TFM-BFM; PFM-Milk; TFM-PFM |
| N6-Acetyl-L-lysine | Organic acids and derivatives | Amino acids, peptides, and analogues | 54.9 | 189.1234 | 7,912,480.11 | 31,548,196.26 | 27,628,780.91 | 44,169,985.40 | 27,814,860.67 | 0.00024 | Milk-BFM; TFM-BFM; PFM-Milk; TFM-Milk |
| Guanosine | Nucleosides, nucleotides, and analogues | Nucleosides, nucleotides, and analogues | 592 | 283.2645 | 30,642,897.63 | 24,146,174.63 | 26,021,227.05 | 24,394,629.96 | 26,301,232.32 | 0.000274 | Milk-BFM; PFM-Milk; TFM-Milk |
| Pantothenol | Lipids and lipid-like molecules | Fatty amides | 107.9 | 206.1389 | 16,916,362.81 | 8,215,291.02 | 7,919,747.22 | 15,994,280.78 | 12,261,420.46 | 0.000344 | Milk-BFM; TFM-BFM; PFM-Milk; TFM-PFM |
| Stearic acid | Lipids and lipid-like molecules | Lipid/Fatty acids and conjugates | 394.5 | 265.1481 | 65,375,497.03 | 44,464,208.82 | 48,433,784.00 | 57,129,922.24 | 53,850,853.02 | 0.00041 | Milk-BFM; PFM-Milk; TFM-PFM |
| Kojibiose | Organic oxygen compounds | carbohydrates and carbohydrate derivatives | 345.9 | 325.1215 | 3,073,219.44 | 1,806,093.39 | 1,431,565.50 | 2,665,940.96 | 2,244,204.82 | 0.000419 | Milk-BFM; TFM-BFM; PFM-Milk; TFM-PFM |
| Uridine | Nucleosides, nucleotides, and analogues | Pyrimidine nucleosides | 73.6 | 243.0627 | 28,972,498.64 | 14,308,832.47 | 23,243,691.33 | 13,795,048.08 | 20,080,017.63 | 0.000502 | PFM-BFM; TFM-BFM; PFM-Milk; TFM-Milk |
| N-Acetyl-a-neuraminic acid | Organic oxygen compounds | Carbohydrates and carbohydrate conjugates | 47 | 308.0986 | 86,272,831.61 | 292,644,476.88 | 464,510,917.88 | 230,179,513.52 | 268,401,934.97 | 0.000504 | Milk-BFM; TFM-BFM; PFM-Milk |
| gamma-Glutamylcysteine | Organic acids and derivatives | Amino acids, peptides, and analogues | 53.6 | 248.9603 | 101,440,061.25 | 60,883,315.93 | 64,622,155.54 | 55,065,337.37 | 70,502,717.52 | 0.000522 | Milk-BFM; PFM-Milk; TFM-Milk |
| Pyridoxamine | Organoheterocyclic compounds | Pyridines and derivatives | 96.6 | 169.0964 | 26,265,187.29 | 57,340,701.85 | 39,799,305.38 | 43,557,047.44 | 41,740,560.49 | 0.000606 | PFM-BFM; PFM-Milk; TFM-Milk |
| Triethylamine | Organic nitrogen compounds | Amines | 556.7 | 102.128 | 2,631,491.23 | 2,864,984.15 | 2,872,307.13 | 2,618,488.14 | 2,746,817.66 | 0.000897 | Milk-BFM; TFM-BFM; PFM-Milk; TFM-PFM |
| Ribitol | Organic oxygen compounds | Carbohydrates and carbohydrate conjugates | 120.7 | 152.0707 | 7,057,353.55 | 5,010,914.62 | 5,993,091.17 | 5,395,665.24 | 5,864,256.15 | 0.000931 | PFM-Milk; TFM-Milk |
| Gluconic acid | Organic oxygen compounds | Carbohydrates and carbohydrate conjugates | 46.9 | 195.0504 | 139,708,871.25 | 125,975,833.09 | 175,539,927.35 | 138,493,388.62 | 144,929,505.08 | 0.001103 | Milk-BFM; PFM-BFM; TFM-BFM |
| Pentadecanoic acid | Lipids and lipid-like molecules | Lipid/Fatty acids and conjugates | 586.1 | 241.2174 | 3,630,247.57 | 40,228,540.34 | 58,285,389.27 | 18,468,078.75 | 30,153,063.98 | 0.001103 | Milk-BFM; TFM-BFM; PFM-Milk |
| Allocholic acid | Lipids and lipid-like molecules | Lipid/Steroids and steroid derivatives | 610 | 408.3685 | 85,908,742.06 | 39,344,859.22 | 41,405,841.76 | 28,287,820.86 | 48,736,815.98 | 0.002209 | Milk-BFM; PFM-Milk; TFM-Milk |
| Linoleic acid | Lipids and lipid-like molecules | Lipid/Fatty acids and conjugates | 516.6 | 280.264 | 102,601.73 | 26,715,710.35 | 29,960,633.02 | 10,516,967.80 | 16,823,978.23 | 0.002209 | Milk-BFM; TFM-BFM; PFM-Milk |
| Stachyose | Organic oxygen compounds | Carbohydrates and carbohydrate conjugates | 51.7 | 649.211 | 893,722.56 | 52,620,490.95 | 70,294,688.93 | 23,551,375.05 | 36,840,069.37 | 0.002214 | Milk-BFM; TFM-BFM; PFM-Milk |
| Alpha-Tocotrienol | Lipids and lipid-like molecules | Prenol lipids | 653.7 | 423.327 | 109,006,654.74 | 72,781,170.39 | 58,243,954.76 | 106,913,078.39 | 86,736,214.57 | 0.002277 | Milk-BFM; TFM-BFM; PFM-Milk; TFM-PFM |
| (S)-Methylmalonic acid semialdehyde | Lipids and lipid-like molecules | Lipid/Fatty acids and conjugates | 127.7 | 102.0343 | 142,062,775.19 | 51,163,424.12 | 13,419,829.43 | 53,329,432.49 | 64,993,865.31 | 0.002319 | Milk-BFM; PFM-Milk; TFM-Milk |
| Trehalose | Organic oxygen compounds | Carbohydrates and carbohydrate conjugates | 51.7 | 342.1394 | 148,334,987.33 | 83,330,942.50 | 430,496,174.65 | 198,808,172.50 | 215,242,569.25 | 0.002319 | Milk-BFM; PFM-BFM; TFM-BFM |
| L-2-Hydroxyglutaric acid | Lipids and lipid-like molecules | Lipid/Fatty acids and conjugates | 39.1 | 148.9768 | 5,301,427.21 | 4,194,975.23 | 2,487,794.30 | 15,799,621.20 | 6,945,954.48 | 0.002953 | TFM-BFM; TFM-Milk; TFM-PFM |
| O-Acetylcarnitine | Lipids and lipid-like molecules | Fatty acid esters | 56.2 | 205.1259 | 401,909,505.27 | 224,826,529.92 | 193,655,095.86 | 235,508,418.38 | 263,974,887.36 | 0.002953 | Milk-BFM; PFM-Milk; TFM-Milk |
| Daidzein | Phenylpropanoids and polyketides | Isoflav-2-enes | 310.1 | 253.0506 | 316,889.17 | 592,945.99 | 521,731.72 | 451,942.93 | 470,877.45 | 0.003607 | Milk-BFM; PFM-Milk |
| L-Carnitine | Organic acids and derivatives | Amino acid derivatives | 51.3 | 162.112 | 339,912,221.77 | 4,288,472,846.33 | 2,142,392,099.67 | 2,401,358,698.83 | 2,293,033,966.65 | 0.003607 | PFM-Milk |
| Iminoarginine | Organic nitrogen compounds | Guanidines | 70 | 173.092 | 16,875,847.70 | 17,683,973.95 | 22,250,121.00 | 15,948,189.71 | 18,189,533.09 | 0.005293 | Milk-BFM; PFM-BFM; TFM-BFM |
| Vitexin | Phenylpropanoids and polyketides | Phenols/Polyphenols/Flavonoids | 537 | 432.2373 | 11,956,036.37 | 35,648,653.42 | 25,957,415.56 | 52,343,989.99 | 31,476,523.84 | 0.005995 | TFM-BFM; TFM-Milk |
| Pantothenic acid | Organic oxygen compounds | Alcohols and polyols | 73.1 | 219.1065 | 11,873,296.24 | 9,273,055.09 | 8,010,616.33 | 9,072,698.44 | 9,557,416.53 | 0.006261 | Milk-BFM; PFM-Milk; TFM-Milk |
| Cyclic AMP | Nucleosides, nucleotides, and analogues | Purine nucleotides | 74.2 | 328.0448 | 5,413,880.99 | 5,304,968.78 | 4,634,467.02 | 7,454,359.89 | 5,701,919.17 | 0.006345 | TFM-BFM; TFM-Milk; TFM-PFM |
| Arachidic acid | Lipids and lipid-like molecules | Lipid/Fatty acids and conjugates | 661.1 | 311.2961 | 22,651,633.58 | 26,747,621.58 | 22,022,212.84 | 23,086,279.89 | 23,626,936.97 | 0.007047 | PFM-BFM; PFM-Milk; TFM-PFM |
| Arachidonic acid | Lipids and lipid-like molecules | Lipid/Fatty acids and conjugates | 571.3 | 303.2329 | 23,656,560.43 | 36,371,574.24 | 14,046,998.82 | 29,503,676.15 | 25,894,702.41 | 0.008508 | PFM-BFM; TFM-BFM |
| myo-Inositol | Organic oxygen compounds | Alcohols and polyols | 176.9 | 161.0424 | 97,108,915.65 | 72,868,915.78 | 84,757,544.62 | 72,805,424.89 | 81,885,200.24 | 0.009484 | PFM-Milk; TFM-Milk |
| Dodecanoic acid | Lipids and lipid-like molecules | Lipid/Fatty acids and conjugates | 687.1 | 199.988 | 188,630,502.11 | 351,449,016.39 | 129,723,926.13 | 159,553,541.19 | 207,339,246.46 | 0.009765 | PFM-BFM; PFM-Milk; TFM-PFM |
| (-)-cis-Carveol | Lipids and lipid-like molecules | Lipid/Terpenoids | 586.4 | 152.1185 | 31,943,291.98 | 86,451,077.81 | 6,513,337.14 | 8,662,293.66 | 33,392,500.14 | 0.010116 | PFM-BFM; TFM-PFM |
| Vitamin D3 | Lipids and lipid-like molecules | Vitamin D and derivatives | 540.7 | 384.3463 | 23,914,861.48 | 16,258,638.18 | 21,494,901.68 | 22,301,583.71 | 20,992,496.26 | 0.010116 | PFM-BFM; PFM-Milk; TFM-PFM |
| Myristic acid | Lipids and lipid-like molecules | Lipid/Fatty acids and conjugates | 557.6 | 227.2012 | 4,289,109.72 | 163,642,446.87 | 169,623,089.55 | 75,526,792.37 | 103,270,359.63 | 0.010166 | Milk-BFM; PFM-Milk |
| Melibiose | Organic oxygen compounds | Carbohydrates and carbohydrate conjugates | 51.7 | 343.1227 | 277,313,994.02 | 648,617,176.48 | 960,255,840.37 | 1,208,244,748.15 | 773,607,939.75 | 0.011374 | Milk-BFM; TFM-Milk |
| Methoxamine | Benzenoids | Benzene and substituted derivatives | 314.6 | 194.1175 | 15,575,037.21 | 10,016,147.53 | 12,997,816.79 | 12,877,871.26 | 12,866,718.20 | 0.012124 | PFM-Milk |
| 3-Methylxanthine | Organoheterocyclic compounds | Purines and purine derivatives | 387.4 | 166.0497 | 2,839,308.93 | 2,160,820.68 | 2,632,131.12 | 2,651,326.35 | 2,570,896.77 | 0.014101 | PFM-BFM; PFM-Milk; TFM-PFM |
| S-Adenosylmethionine | Nucleosides, nucleotides, and analogues | Purine Nucleosides | 430 | 398.2415 | 17,273,754.37 | 72,046,434.85 | 50,825,677.73 | 36,059,888.38 | 44,051,438.83 | 0.015505 | PFM-Milk |
| N-Acetylleucine | Organic acids and derivatives | Amino acids, peptides, and analogues | 243.5 | 174.1127 | 2,165,971.39 | 4,144,347.87 | 3,635,586.24 | 3,298,133.07 | 3,311,009.64 | 0.019308 | Milk-BFM; PFM-Milk |
| Leucine | Organic acids and derivatives | Amino acids, peptides, and analogues | 74.3 | 130.0867 | 12,362,121.63 | 13,746,540.41 | 13,639,658.38 | 17,058,049.28 | 14,201,592.43 | 0.019434 | TFM-BFM; TFM-Milk |
| Homovanillic acid | Benzenoids | Phenols/Methoxyphenols | 405.2 | 182.9871 | 360,570,994.98 | 756,750,304.08 | 987,940,258.25 | 615,751,485.27 | 680,253,260.65 | 0.019469 | Milk-BFM |
| 1,2-Epoxy-p-menth-8-ene | Lipids and lipid-like molecules | Prenol Lipids | 285.7 | 153.1276 | 5,793,639.37 | 7,650,952.86 | 5,684,321.03 | 8,608,576.40 | 6,934,372.42 | 0.032292 | TFM-BFM; TFM-Milk |
| Hydroxypyruvic acid | Organic acids and derivatives | Hydroxy acids and derivatives | 592.6 | 105.0435 | 21,745,619.79 | 9,265,434.09 | 12,308,507.10 | 7,841,085.90 | 12,790,161.72 | 0.032641 | PFM-Milk; TFM-Milk |
| Dihydrouracil | Organoheterocyclic compounds | Diazines | 165.5 | 112.9841 | 3,545,683.47 | 1,926,770.65 | 1,522,546.31 | 2,342,558.14 | 2,334,389.64 | 0.034863 | Milk-BFM; PFM-Milk |
| Guanine | Organoheterocyclic compounds | Nucleosides, nucleotides, and analogues | 54.9 | 152.0568 | 6,419,350.10 | 4,094,922.47 | 3,634,745.76 | 3,951,354.60 | 4,525,093.23 | 0.03984 | Milk-BFM; TFM-Milk |
| Norspermidine | Organic nitrogen compounds | Amines | 546.3 | 220.1466 | 6,232,658.16 | 5,183,055.39 | 5,870,728.91 | 7,369,373.66 | 6,163,954.03 | 0.040622 | TFM-PFM |
| Indolelactic acid | Organoheterocyclic compounds | Alkaloids/Indoles and derivatives | 278.7 | 206.0813 | 5,966,505.05 | 5,818,684.76 | 9,103,513.38 | 6,676,233.93 | 6,891,234.28 | 0.044125 | Milk-BFM; PFM-BFM |

Data analyzed by one-way analysis of variance and post hoc analyses using Tukey’s honestly significant difference test, and a false discovery rate-adjusted *p*-value (*q*-value) of < 0.05 representing statistical significance. Milk, raw buffalo milk; PFM, fermented buffalo milk produced with *L. plantarum* B and a traditional yogurt starter; BFM, fermented buffalo milk produced with *L. plantarum* B; TFM, fermented buffalo milk produced with a traditional yogurt starter.

**Table 2** Differentially abundant metabolites in raw buffalo milk and fermented milks produced with *L. plantarum* B, a traditional yogurt starter, or both

| Name | Level | Superclass | Class or Subclass | Retention time (s) | m/z | Milk | PFM | BFM | TFM | PFM vs. Milk | | BFM vs. Milk | | TFM vs. Milk | |
| --- | --- | --- | --- | --- | --- | --- | --- | --- | --- | --- | --- | --- | --- | --- | --- |
| Fold Change | FDR-adjusted p-value | Fold Change | FDR-adjusted p-value | Fold Change | FDR-adjusted p-value |
| (-)-cis-Carveol | MS2 | Lipids and lipid-like molecules | Lipid/Terpenoids | 586.4 | 152.1185 | 31943291.98 | 86451077.81 | 6513337.137 | 8662293.657 | 2.7064 | 0.20978 | 0.2039 | 1.77E-08 | 0.27118 | 0.0000427 |
| (S)-1-Phenylethanol | MS2 | Organic oxygen compounds | Alcohols and polyols | 43 | 123.0407 | 985027340.6 | 531124726.7 | 548506707.6 | 408466309.1 | 0.5392 | 0.004661 | 0.55684 | 0.000264 | 0.41468 | 0.000037 |
| (S)-beta-Tyrosine | MS2 | Organic acids and derivatives | Amino acids, peptides, and analogues | 90.6 | 182.0813 | 440766.3098 | 7175741.24 | 2601554.338 | 8533385.347 | 16.28 | 0.000016 | 5.9023 | 0.000139 | 19.36 | 2.26E-08 |
| (S)-Methylmalonic acid semialdehyde | MS2 | Lipids and lipid-like molecules | Lipid/Fatty acids and conjugates | 127.7 | 102.0343 | 142062775.2 | 51163424.12 | 13419829.43 | 53329432.49 | 0.36015 | 0.086869 | 0.094464 | 0.020198 | 0.37539 | 0.12231 |
| 10-Hydroxydecanoic acid | MS2 | Lipids and lipid-like molecules | Lipid/Fatty acids and conjugates | 345.9 | 189.1485 | 1714852.835 | 6993776.508 | 5110790.875 | 7280647.914 | 4.0784 | 0.000000262 | 2.9803 | 0.006908 | 4.2456 | 2.26E-08 |
| 12-Hydroxydodecanoic acid | MS2 | Lipids and lipid-like molecules | Lipid/Fatty acids and conjugates | 484.3 | 199.1689 | 58270501.04 | 44479347.13 | 41058489.03 | 25571006.71 | 0.76333 | 0.54932 | 0.70462 | 0.11875 | 0.43883 | 0.0066512 |
| 16-Hydroxy hexadecanoic acid | MS2 | Lipids and lipid-like molecules | Lipid/Fatty acids and conjugates | 512.6 | 255.2318 | 35610382.53 | 6763678.049 | 17237579.58 | 5637071.241 | 0.18994 | 0.000122 | 0.48406 | 0.009754 | 0.1583 | 0.00014012 |
| 1-Aminocyclopropanecarboxylic acid | MS2 | Organic acids and derivatives | Amino acids, peptides, and analogues | 573.2 | 101.0713 | 1184579.353 | 45041420.57 | 21683575.06 | 54789419.86 | 38.023 | 0.0000312 | 18.305 | 0.000364 | 46.252 | 0.00000421 |
| 1-palmitoylglycerophosphocholine | MS2 | Lipids and lipid-like molecules | Lipid/Glycerophospholipids | 490.2 | 496.3401 | 106588023.7 | 3421615.008 | 61120939.46 | 3733919.852 | 0.032101 | 0.00000311 | 0.57343 | 0.029277 | 0.035031 | 0.00000159 |
| 2',4'-Dihydroxyacetophenone | MS2 | Benzenoids | Benzene and substituted derivatives | 598.3 | 150.9971 | 295670528.9 | 53803891.95 | 212114971.7 | 65892384.26 | 0.18197 | 0.000000262 | 0.7174 | 0.001873 | 0.22286 | 0.000000182 |
| 9,10-Epoxyoctadecenoic acid | MS2 | Lipids and lipid-like molecules | Lipid/Fatty acids and conjugates | 452.5 | 295.2283 | 234522.7785 | 3676175.728 | 3944721.966 | 4598350.26 | 15.675 | 0.0000468 | 16.82 | 0.0000982 | 19.607 | 0.000000134 |
| Acetylcholine | MS2 | Organic nitrogen compounds | Quaternary ammonium salts | 54.9 | 146.1174 | 384068295.5 | 1311514042 | 761711068.7 | 1456656520 | 3.4148 | 0.0000414 | 1.9833 | 0.000913 | 3.7927 | 0.000000871 |
| Allantoin | MS2 | Organoheterocyclic compounds | Azoles | 40 | 158.9604 | 171570041.6 | 76305739.14 | 148726926.8 | 116344995.2 | 0.44475 | 0.030881 | 0.86686 | 0.76729 | 0.67812 | 0.34113 |
| Allocholic acid | MS2 | Lipids and lipid-like molecules | Lipid/Steroids and steroid derivatives | 610 | 408.3685 | 85908742.07 | 39344859.22 | 41405841.76 | 28287820.86 | 0.45798 | 0.038233 | 0.48197 | 0.065268 | 0.32928 | 0.018691 |
| Apigenin | MS2 | Phenylpropanoids and polyketides | Flavonoids | 343.4 | 269.045 | 679757.6516 | 347493.0765 | 821274.9057 | 259218.527 | 0.5112 | 0.0000309 | 1.2082 | 0.029277 | 0.38134 | 0.00028903 |
| Cellobiose | MS2 | Organic oxygen compounds | Carbohydrates and carbohydrate conjugates | 51 | 341.1085 | 67436255.82 | 753847332.5 | 460511575 | 797733871.4 | 11.179 | 0.00000877 | 6.8288 | 1.02E-08 | 11.829 | 0.000000397 |
| Confertifolin | MS2 | Lipids and lipid-like molecules | Lipid/Terpenoids | 291.6 | 235.1725 | 893552.5185 | 2917444.014 | 1683737.872 | 1625979.419 | 3.265 | 0.003937 | 1.8843 | 0.13206 | 1.8197 | 0.50669 |
| Deoxyuridine | MS2 | Nucleosides, nucleotides, and analogues | Pyrimidine nucleosides | 576.7 | 228.1961 | 19513552.1 | 41896695.41 | 5608220.272 | 74449693.75 | 2.1471 | 0.085785 | 0.2874 | 0.012675 | 3.8153 | 0.00023101 |
| Dethiobiotin | MS2 | Lipids and lipid-like molecules | Lipid/Fatty acids and conjugates | 689.3 | 213.983 | 12384945.86 | 86708684.85 | 88230868.95 | 57754738.97 | 7.0011 | 0.013399 | 7.124 | 0.0000107 | 4.6633 | 0.4041 |
| D-Glycero-D-galacto-heptitol | MS2 | Organic oxygen compounds | Carbohydrates and carbohydrate conjugates | 549.2 | 195.0847 | 62573696.89 | 169360012.3 | 134189389.3 | 131035555.8 | 2.7066 | 0.19078 | 2.1445 | 0.005316 | 2.0941 | 0.13645 |
| dGMP | MS2 | Nucleosides, nucleotides, and analogues | Purine nucleotides | 523.9 | 347.1709 | 849013.262 | 45761202.19 | 29877290.49 | 34046676.46 | 53.899 | 0.000000494 | 35.191 | 0.000000365 | 40.101 | 0.00000236 |
| Dihydrouracil | MS2 | Organoheterocyclic compounds | Diazines | 165.5 | 112.9841 | 3545683.467 | 1926770.653 | 1522546.314 | 2342558.145 | 0.54341 | 0.067016 | 0.42941 | 0.002694 | 0.66068 | 0.069168 |
| Dimethylglycine | MS2 | Organic acids and derivatives | Amino acids, peptides, and analogues | 49.7 | 104.1068 | 728069687.7 | 4313800104 | 1551098358 | 7196108327 | 5.925 | 0.001321 | 2.1304 | 0.000000035 | 9.8838 | 0.0000235 |
| D-Mannose | MS2 | Organic oxygen compounds | Carbohydrates and carbohydrate conjugates | 172.5 | 181.071 | 16002814.56 | 20103588.27 | 5579552.581 | 19961506.74 | 1.2563 | 0.36913 | 0.34866 | 0.00182 | 1.2474 | 0.31647 |
| dTMP | MS2 | Nucleosides, nucleotides, and analogues | Pyrimidine nucleotides | 271.7 | 321.0435 | 3908591.949 | 299089.2263 | 2134302.821 | 317761.632 | 0.076521 | 0.00000264 | 0.54605 | 0.000619 | 0.081298 | 0.00000136 |
| Estragole | MS2 | Benzenoids | Phenol ethers | 666.6 | 148.087 | 6053749.768 | 40853899.45 | 11120311.82 | 49426971.5 | 6.7485 | 0.0000414 | 1.8369 | 0.038257 | 8.1647 | 0.00000605 |
| Folic acid | MS2 | Benzenoids | Phenols/Methoxyphenols | 440.5 | 441.2535 | 3471471.271 | 173494.1295 | 3230361.829 | 198690.7812 | 0.049977 | 0.000074 | 0.93055 | 0.87929 | 0.057235 | 0.0000704 |
| Genistein | MS2 | Phenylpropanoids and polyketides | Isoflavonoids | 492.8 | 271.2269 | 14402208.58 | 23492348.07 | 46349876.75 | 15054357.09 | 1.6312 | 0.016711 | 3.2182 | 0.0000608 | 1.0453 | 0.93872 |
| Glycitein | MS2 | Phenylpropanoids and polyketides | Isoflavonoids | 347.3 | 283.0685 | 3357447.267 | 583432.6159 | 1212475.717 | 608550.1424 | 0.17377 | 0.000000125 | 0.36113 | 0.000000365 | 0.18125 | 5.26E-08 |
| Hippuric acid | MS2 | Benzenoids(amino acid metabolism) | Benzene and substituted derivatives | 96.7 | 179.0538 | 87229405.81 | 313622105 | 151258453.9 | 121959476.6 | 3.5954 | 0.0000139 | 1.734 | 0.17103 | 1.3981 | 0.58593 |
| Homo-L-arginine | MS2 | Organic acids and derivatives | Amino acids, peptides, and analogues | 380.6 | 187.0436 | 10587.96492 | 3199947.003 | 6903794.628 | 1117021.448 | 302.22 | 0.003529 | 652.04 | 2.4E-09 | 105.5 | 0.53177 |
| Homovanillic acid | MS2 | Benzenoids | Phenols/Methoxyphenols | 405.2 | 182.9871 | 360570995 | 756750304.2 | 987940258.3 | 615751485.2 | 2.0988 | 0.01638 | 2.7399 | 0.001373 | 1.7077 | 0.35822 |
| Hydroxypyruvic acid | MS2 | Organic acids and derivatives | Hydroxy acids and derivatives | 592.6 | 105.0435 | 21745619.78 | 9265434.094 | 12308507.1 | 7841085.902 | 0.42608 | 0.01161 | 0.56602 | 0.13399 | 0.36058 | 0.032144 |
| Isovaleric acid | MS2 | Lipids and lipid-like molecules | Lipid/Fatty acids and conjugates | 148.3 | 102.0343 | 4002109.226 | 38968330.14 | 11174655.9 | 40288296.24 | 9.7369 | 0.0000414 | 2.7922 | 0.000106 | 10.067 | 0.000000397 |
| Kojibiose | MS2 | Organic oxygen compounds | carbohydrates and carbohydrate derivatives | 345.9 | 325.1215 | 3073219.439 | 1806093.394 | 1431565.498 | 2665940.955 | 0.58769 | 0.000424 | 0.46582 | 0.0000271 | 0.86747 | 0.61086 |
| L-2-Hydroxyglutaric acid | MS2 | Lipids and lipid-like molecules | Lipid/Fatty acids and conjugates | 39.1 | 148.9768 | 5301427.213 | 4194975.226 | 2487794.295 | 15799621.21 | 0.79129 | 0.81407 | 0.46927 | 0.012675 | 2.9803 | 0.022608 |
| L-Carnitine | MS2 | Organic nitrogen compounds | Quaternary ammonium salts | 51.3 | 162.112 | 339912221.8 | 4288472846 | 2142392100 | 2401358699 | 12.616 | 0.001999 | 6.3028 | 4.47E-08 | 7.0646 | 0.12521 |
| L-Dopa | MS2 | Organic acids and derivatives | Amino acids, peptides, and analogues | 204.7 | 180.0656 | 4503941.954 | 714021.4207 | 3070534.198 | 2808299.363 | 0.15853 | 0.000221 | 0.68174 | 0.00000256 | 0.62352 | 0.062964 |
| Linoleic acid | MS2 | Lipids and lipid-like molecules | Lipid/Fatty acids and conjugates | 516.6 | 280.264 | 102601.7334 | 26715710.35 | 29960633.02 | 10516967.8 | 260.38 | 0.003255 | 292.01 | 1.09E-11 | 102.5 | 0.43076 |
| L-Serine | MS2 | Organic acids and derivatives | Amino acids, peptides, and analogues | 682.3 | 105.0434 | 47741402.18 | 7879400.454 | 37254604.9 | 30364990.46 | 0.16504 | 0.000457 | 0.78034 | 0.000619 | 0.63603 | 0.083698 |
| Melibiose | MS2 | Organic oxygen compounds | Carbohydrates and carbohydrate conjugates | 51.7 | 343.1227 | 277313994 | 648617176.4 | 960255840.3 | 1208244748 | 2.3389 | 0.25264 | 3.4627 | 0.027375 | 4.357 | 0.0012209 |
| Myristic acid | MS2 | Lipids and lipid-like molecules | Lipid/Fatty acids and conjugates | 557.6 | 227.2012 | 4289109.718 | 163642446.9 | 169623089.6 | 75526792.38 | 38.153 | 0.004761 | 39.547 | 9.53E-10 | 17.609 | 0.43007 |
| N6-Acetyl-L-lysine | MS2 | Organic acids and derivatives | Amino acids, peptides, and analogues | 54.9 | 189.1234 | 7912480.114 | 31548196.25 | 27628780.9 | 44169985.4 | 3.9871 | 0.0000541 | 3.4918 | 0.000000841 | 5.5823 | 0.0046056 |
| N-Acetyl-a-neuraminic acid | MS2 | Organic oxygen compounds | Carbohydrates and carbohydrate conjugates | 47 | 308.0986 | 86272831.62 | 292644476.9 | 464510917.9 | 230179513.5 | 3.3921 | 0.009554 | 5.3842 | 0.00000749 | 2.668 | 0.19274 |
| N-Acetylglutamic acid | MS2 | Organic acids and derivatives | Amino acids, peptides, and analogues | 56.2 | 189.0869 | 5299675.731 | 57968038.49 | 15638928.33 | 64769611.47 | 10.938 | 0.0000505 | 2.9509 | 0.0000245 | 12.221 | 0.00000289 |
| N-Methyl-D-aspartic acid | MS2 | Organic acids and derivatives | Amino acids, peptides, and analogues | 277.7 | 145.9988 | 44194049.36 | 15281361.74 | 43446334.14 | 10986282.47 | 0.34578 | 0.0000112 | 0.98308 | 0.90469 | 0.24859 | 0.000000823 |
| O-Acetylcarnitine | MS2 | Lipids and lipid-like molecules | Fatty acid esters | 56.2 | 205.1259 | 401909505.3 | 224826529.9 | 193655095.9 | 235508418.4 | 0.5594 | 0.009554 | 0.48184 | 0.000326 | 0.58597 | 0.013084 |
| O-Acetyl-L-homoserine | MS2 | Organic acids and derivatives | non-proteinogenic alpha-amino acid | 55.6 | 162.0763 | 8857658.856 | 92670471.78 | 27607379.62 | 97762154.17 | 10.462 | 0.0000208 | 3.1168 | 0.000112 | 11.037 | 0.0000221 |
| Oleoylethanolamide | MS2 | Organic nitrogen compounds | Amines | 617.2 | 308.2951 | 24620676.41 | 48597646.64 | 66099841.87 | 48479681.92 | 1.9739 | 0.031473 | 2.6847 | 0.000222 | 1.9691 | 0.014884 |
| o-Toluate | MS2 | Benzenoids | Benzene and substituted derivatives | 262.5 | 135.0442 | 250363.1616 | 2582727.965 | 2474577.233 | 3417170.648 | 10.316 | 0.000238 | 9.884 | 0.0000131 | 13.649 | 0.0000235 |
| Pantothenol | MS2 | Lipids and lipid-like molecules | Fatty amides | 107.9 | 206.1389 | 16916362.81 | 8215291.02 | 7919747.218 | 15994280.78 | 0.48564 | 0.001916 | 0.46817 | 0.0000245 | 0.94549 | 0.82104 |
| Pelargonic acid | MS2 | Lipids and lipid-like molecules | Lipid/Fatty acids and conjugates | 556.5 | 157.1226 | 11547364.38 | 15671823.66 | 53730595.16 | 13306994.12 | 1.3572 | 0.66756 | 4.6531 | 0.00000547 | 1.1524 | 0.75115 |
| Pentadecanoic acid | MS2 | Lipids and lipid-like molecules | Lipid/Fatty acids and conjugates | 586.1 | 241.2174 | 3630247.566 | 40228540.34 | 58285389.27 | 18468078.75 | 11.081 | 0.00401 | 16.055 | 0.000151 | 5.0873 | 0.43007 |
| Phosphoglycolic acid | MS2 | Organic acids and derivatives | Phosphate esters | 689.3 | 155.9923 | 13296711.57 | 291998622.8 | 402404271 | 152697444.7 | 21.96 | 0.000841 | 30.263 | 0.00000749 | 11.484 | 0.16941 |
| Phosphorylcholine | MS2 | Organic nitrogen compounds | Quaternary ammonium salts | 51.2 | 184.0732 | 265782243.9 | 290004576.7 | 675126969.1 | 315607658.8 | 1.0911 | 0.12483 | 2.5402 | 0.000000365 | 1.1875 | 0.43547 |
| Pipecolic acid | MS2 | Organic acids and derivatives | Amino acids, peptides, and analogues | 55.8 | 130.0863 | 265190944.1 | 84805794.08 | 115730957.9 | 97102249.83 | 0.31979 | 0.0000139 | 0.43641 | 0.0000297 | 0.36616 | 0.00000289 |
| Pyridoxamine | MS2 | Organoheterocyclic compounds | Pyridines and derivatives | 96.6 | 169.0964 | 26265187.3 | 57340701.85 | 39799305.38 | 43557047.43 | 2.1831 | 0.005697 | 1.5153 | 0.041786 | 1.6584 | 0.014409 |
| Rutin | MS2 | Phenylpropanoids and polyketides | Flavonoids | 658.8 | 593.158 | 981165.6853 | 12414070.51 | 5171356.634 | 10103660.27 | 12.652 | 0.00000522 | 5.2706 | 0.023806 | 10.298 | 0.0026671 |
| S-Adenosylmethionine | MS2 | Nucleosides, nucleotides, and analogues | Purine Nucleosides | 430 | 398.2415 | 17273754.37 | 72046434.85 | 50825677.73 | 36059888.38 | 4.1709 | 0.030881 | 2.9424 | 0.0002 | 2.0876 | 0.17114 |
| Stachyose | MS2 | Organic oxygen compounds | Carbohydrates and carbohydrate conjugates | 51.7 | 649.211 | 893722.5609 | 52620490.95 | 70294688.93 | 23551375.05 | 58.878 | 0.012087 | 78.654 | 0.000000486 | 26.352 | 0.37637 |
| trans-1,2-Cyclohexanediol | MS2 | Organic oxygen compounds | Alcohols and polyols | 665.1 | 115.9198 | 61853957.35 | 205253651.5 | 206853652.4 | 260596609.1 | 3.3184 | 0.000122 | 3.3442 | 0.000000156 | 4.2131 | 0.00000664 |
| Trehalose | MS2 | Organic oxygen compounds | Carbohydrates and carbohydrate conjugates | 51.7 | 342.1394 | 148334987.3 | 83330942.49 | 430496174.7 | 198808172.5 | 0.56178 | 0.37543 | 2.9022 | 0.010588 | 1.3403 | 0.66524 |
| Tridemorph | MS2 | Organoheterocyclic compounds | Oxazines/Morpholines | 637.1 | 298.3107 | 1679822.15 | 58265830.48 | 27619653.68 | 86413636.36 | 34.686 | 0.000073 | 16.442 | 0.072947 | 51.442 | 0.0000115 |
| Trigonelline | MS2 | Alkaloids and derivatives | Alkaloids derived from nicotinic acid | 53.1 | 138.055 | 188386694.1 | 88644947.38 | 84858835.4 | 161837312 | 0.47055 | 0.002857 | 0.45045 | 8.09E-10 | 0.85907 | 0.43007 |
| Uric acid | MS2 | Organoheterocyclic compounds | Purines and purine derivatives | 48.1 | 167.0204 | 237099014.4 | 87737025.99 | 175668396.8 | 89615618.37 | 0.37004 | 0.00000517 | 0.74091 | 0.005384 | 0.37797 | 0.0000124 |
| Uridine | MS2 | Nucleosides, nucleotides, and analogues | Pyrimidine nucleosides | 73.6 | 243.0627 | 28972498.64 | 14308832.47 | 23243691.33 | 13795048.08 | 0.49388 | 0.000442 | 0.80227 | 0.15686 | 0.47614 | 0.011062 |
| Vitexin | MS2 | Phenylpropanoids and polyketides | Flavonoids | 537 | 432.2373 | 11956036.37 | 35648653.42 | 25957415.56 | 52343990 | 2.9816 | 0.11585 | 2.1711 | 0.18683 | 4.378 | 0.00068885 |
| 2-Pyrocatechuic acid | MS2 | Benzenoids | Benzene and substituted derivatives | 215.1 | 153.018 | 84606355.09 | 50958234.08 | 98467973.85 | 47268758.49 | 0.6023 | 0.000939 | 1.1638 | 0.043318 | 0.55869 | 0.0000747 |
| 3-Methylxanthine | MS2 | Organoheterocyclic compounds | Purines and purine derivatives | 387.4 | 166.0497 | 2839308.935 | 2160820.683 | 2632131.116 | 2651326.353 | 0.76104 | 0.004661 | 0.92703 | 0.50996 | 0.93379 | 0.27352 |
| Alpha-Tocotrienol | MS2 | Lipids and lipid-like molecules | Prenol lipids | 653.7 | 423.327 | 109006654.7 | 72781170.39 | 58243954.76 | 106913078.4 | 0.66768 | 0.020439 | 0.53432 | 0.001837 | 0.98079 | 0.95977 |
| Arachidonic acid | MS2 | Lipids and lipid-like molecules | Lipid/Fatty acids and conjugates | 571.3 | 303.2329 | 23656560.43 | 36371574.24 | 14046998.82 | 29503676.15 | 1.5375 | 0.06911 | 0.59379 | 0.13851 | 1.2472 | 0.60389 |
| Creatinine | MS2 | Organic acids and derivatives | Amino acids, peptides, and analogues | 104.5 | 112.9841 | 3421151.727 | 4049369.875 | 5112839.421 | 4231789.896 | 1.1836 | 0.000291 | 1.4945 | 0.000000156 | 1.2369 | 0.00000898 |
| Daidzein | MS2 | Phenylpropanoids and polyketides | Isoflavonoids | 310.1 | 253.0506 | 316889.165 | 592945.9935 | 521731.7194 | 451942.9346 | 1.8711 | 0.000346 | 1.6464 | 0.020425 | 1.4262 | 0.14444 |
| Exemestane | MS2 | Lipids and lipid-like molecules | Lipid/Steroids and steroid derivatives | 488.9 | 296.1763 | 474597.1966 | 456078.445 | 289717.9615 | 507048.58 | 0.96098 | 0.65521 | 0.61045 | 0.0000245 | 1.0684 | 0.60574 |
| gamma-Glutamylcysteine | MS2 | Organic acids and derivatives | Amino acids, peptides, and analogues | 53.6 | 248.9603 | 101440061.2 | 60883315.93 | 64622155.54 | 55065337.37 | 0.60019 | 0.005697 | 0.63705 | 0.0002 | 0.54284 | 0.00070003 |
| Gluconic acid | MS2 | Organic oxygen compounds | Carbohydrates and carbohydrate conjugates | 46.9 | 195.0504 | 139708871.3 | 125975833.1 | 175539927.4 | 138493388.6 | 0.9017 | 0.46637 | 1.2565 | 0.021669 | 0.9913 | 0.96517 |
| Guanine | MS2 | Organoheterocyclic compounds | Nucleosides, nucleotides, and analogues | 54.9 | 152.0568 | 6419350.097 | 4094922.475 | 3634745.762 | 3951354.603 | 0.6379 | 0.060216 | 0.56622 | 0.031407 | 0.61554 | 0.12231 |
| Guanosine | MS2 | Nucleosides, nucleotides, and analogues | Nucleosides, nucleotides, and analogues | 592 | 283.2645 | 30642897.63 | 24146174.63 | 26021227.05 | 24394629.96 | 0.78799 | 0.003343 | 0.84918 | 0.004146 | 0.79609 | 0.0048582 |
| Iminoarginine | MS2 | Organic nitrogen compounds | Guanidines | 70 | 173.092 | 16875847.7 | 17683973.95 | 22250121 | 15948189.71 | 1.0479 | 0.71471 | 1.3185 | 0.031441 | 0.94503 | 0.7266 |
| Indolelactic acid | MS2 | Organoheterocyclic compounds | Alkaloids/Indoles and derivatives | 278.7 | 206.0813 | 5966505.052 | 5818684.757 | 9103513.377 | 6676233.925 | 0.97522 | 0.91716 | 1.5258 | 0.075609 | 1.119 | 0.68803 |
| Kaempferide | MS2 | Phenylpropanoids and polyketides | Flavonoids | 556.5 | 299.2593 | 43845611.12 | 76061581.18 | 41657250.75 | 83533888.15 | 1.7348 | 0.003846 | 0.95009 | 0.55646 | 1.9052 | 0.00010221 |
| L-Arginine | MS2 | Organic acids and derivatives | Amino acids, peptides, and analogues | 45.7 | 175.1191 | 36994687.39 | 29441311.5 | 23613651.76 | 23852772.15 | 0.79583 | 0.090159 | 0.6383 | 0.031099 | 0.64476 | 0.14714 |
| Levonorgestrel | MS2 | Lipids and lipid-like molecules | Lipid/Steroids and steroid derivatives | 524.4 | 311.2012 | 5859519.911 | 8165955.45 | 10138445.8 | 8245460.32 | 1.3936 | 0.026188 | 1.7303 | 0.0000512 | 1.4072 | 0.020787 |
| Methoxamine | MS2 | Benzenoids | Benzene and substituted derivatives | 314.6 | 194.1175 | 15575037.21 | 10016147.53 | 12997816.79 | 12877871.26 | 0.64309 | 0.00401 | 0.83453 | 0.17205 | 0.82683 | 0.13757 |
| myo-Inositol | MS2 | Organic oxygen compounds | Alcohols and polyols | 176.9 | 161.0424 | 97108915.65 | 72868915.78 | 84757544.62 | 72805424.89 | 0.75038 | 0.038233 | 0.87281 | 0.36087 | 0.74973 | 0.054366 |
| Norepinephrine | MS2 | Benzenoids | Phenols/Polyphenols | 76.8 | 168.066 | 4813117.467 | 3194058.422 | 2752184.026 | 3783122.067 | 0.66362 | 0.00026 | 0.57181 | 0.0000146 | 0.786 | 0.0066949 |
| Oxoglutaric acid | MS2 | Organic acids and derivatives | Keto acids and derivatives | 42.9 | 146.03 | 36209247.65 | 66952921.41 | 58550179.11 | 69973193.43 | 1.8491 | 0.000222 | 1.617 | 0.000866 | 1.9325 | 0.0000326 |
| Palmitoleic acid | MS2 | Lipids and lipid-like molecules | Lipid/Fatty acids and conjugates | 573.9 | 253.2175 | 27754987.17 | 47014377.23 | 26293470.81 | 51931961.14 | 1.6939 | 0.004003 | 0.94734 | 0.49059 | 1.8711 | 0.0000209 |
| Pantothenic acid | MS2 | Organic oxygen compounds | Alcohols and polyols | 73.1 | 219.1065 | 11873296.24 | 9273055.094 | 8010616.335 | 9072698.444 | 0.781 | 0.11279 | 0.67468 | 0.000169 | 0.76413 | 0.0013393 |
| Ribitol | MS2 | Organic oxygen compounds | Carbohydrates and carbohydrate conjugates | 120.7 | 152.0707 | 7057353.554 | 5010914.617 | 5993091.175 | 5395665.235 | 0.71003 | 0.004761 | 0.8492 | 0.018481 | 0.76455 | 0.0054688 |
| Stearic acid | MS2 | Lipids and lipid-like molecules | Lipid/Fatty acids and conjugates | 394.5 | 265.1481 | 65375497.03 | 44464208.82 | 48433784 | 57129922.24 | 0.68014 | 0.0000267 | 0.74086 | 0.000000365 | 0.87387 | 0.33484 |
| Vitamin D3 | MS2 | Lipids and lipid-like molecules | Vitamin D and derivatives | 540.7 | 384.3463 | 23914861.48 | 16258638.18 | 21494901.68 | 22301583.71 | 0.67986 | 0.001438 | 0.89881 | 0.40722 | 0.93254 | 0.58593 |
| 1,2-Epoxy-p-menth-8-ene | MS2 | Lipids and lipid-like molecules | Prenol Lipids | 285.7 | 153.1276 | 5793639.375 | 7650952.865 | 5684321.031 | 8608576.403 | 1.3206 | 0.04723 | 0.98113 | 0.87929 | 1.4859 | 0.11649 |
| 3-Dehydrosphinganine | MS2 | Lipids and lipid-like molecules | lipid/sphingolipid | 494.4 | 300.2899 | 9584119.745 | 14119909.45 | 14085321.96 | 15235296.46 | 1.4733 | 0.003396 | 1.4697 | 0.003587 | 1.5896 | 0.0020925 |
| Arachidic acid | MS2 | Lipids and lipid-like molecules | Lipid/Fatty acids and conjugates | 661.1 | 311.2961 | 22651633.58 | 26747621.58 | 22022212.84 | 23086279.89 | 1.1808 | 0.00924 | 0.97221 | 0.81429 | 1.0192 | 0.86369 |
| Leucine | MS2 | Organic acids and derivatives | Amino acids, peptides, and analogues | 74.3 | 130.0867 | 12362121.63 | 13746540.41 | 13639658.38 | 17058049.28 | 1.112 | 0.47823 | 1.1033 | 0.50996 | 1.3799 | 0.0029627 |
| Methyl jasmonate | MS2 | Lipids and lipid-like molecules | Lipid/Lineolic acids and derivatives | 534.2 | 223.9883 | 29766134.63 | 40037760.24 | 44925264.36 | 33947559.63 | 1.3451 | 0.3921 | 1.5093 | 0.0000861 | 1.1405 | 0.74589 |
| N-Acetylleucine | MS2 | Organic acids and derivatives | Amino acids, peptides, and analogues | 243.5 | 174.1127 | 2165971.386 | 4144347.867 | 3635586.243 | 3298133.067 | 1.9134 | 0.002857 | 1.6785 | 0.031407 | 1.5227 | 0.075447 |
| Palmitic acid | MS2 | Lipids and lipid-like molecules | Lipid/Fatty acids and conjugates | 592.1 | 255.2334 | 19241176.01 | 36965988.04 | 29308477.25 | 28845031.47 | 1.9212 | 0.007697 | 1.5232 | 0.00555 | 1.4991 | 0.43007 |
| Phthalic acid | MS2 | Benzenoids | Benzene and substituted derivatives | 612.8 | 165.0406 | 438832713.2 | 621542287.3 | 264685197.9 | 637966143.8 | 1.4164 | 0.2959 | 0.60316 | 0.31224 | 1.4538 | 0.74127 |
| Pyrrolidonecarboxylic acid | MS2 | Organic acids and derivatives | Amino acids, peptides, and analogues | 58.6 | 130.0508 | 101989885.9 | 174285149.3 | 109030074.4 | 136846404.4 | 1.7088 | 0.011938 | 1.069 | 0.31308 | 1.3418 | 0.50119 |
| Triethylamine | MS2 | Organic nitrogen compounds | Amines | 556.7 | 102.128 | 2631491.233 | 2864984.153 | 2872307.125 | 2618488.144 | 1.0887 | 0.011938 | 1.0915 | 0.027375 | 0.99506 | 0.92048 |
| Angiotensin III | MS1 | Organic acids and derivatives | Amino acids, peptides, and analogues | 307.2 | 931.5254 | 3574230.508 | 702415.7692 | 3918416.949 | 517997.6745 | 0.196522235 | 0.001369 | 1.096296655 | 0.87929 | 0.144925649 | 0.001108 |
| val-leu-pro-val-pro (VLPVP) | MS1 | Organic acids and derivatives | Amino acids, peptides, and analogues | 253.4 | 652.4028 | 536371.5948 | 54003955.98 | 85838715.71 | 24983483.98 | 100.68 | 0.006193 | 160.04 | 0.000000134 | 46.579 | 0.42499 |
| Lys-Gln-Ala-Gly-Asp-Val (KQAGDV) | MS1 | Organic acids and derivatives | Amino acids, peptides, and analogues | 232.7 | 597.2988 | 56143.73704 | 434382.3733 | 62322.34635 | 655334.4581 | 7.736969361 | 0.0000637 | 1.110049841 | 0.91698 | 11.672441 | 0.0000935 |
| TyrMe-Phe4Cl-OH | MS1 | Organic acids and derivatives |  | 49 | 498.1248 | 124,607,757.06 | 27,436,765.01 | 33679493.74 | 21012720.2 | 0.22019 | 0.000352 | 0.27028 | 0.000253 | 0.16863 | 0.000142 |
| 17(R)-HDoHE | MS1 | Lipids and lipid-like molecules |  | 303.2 | 344.2444 | 20,964.58 | 110,256.63 | 14437.38736 | 128550.4284 | 5.2592 | 0.0000341 | 0.68865607 | 0.294253594 | 6.1318 | 0.00000592 |
| 20-HETE | MS1 | Lipids and lipid-like molecules | Lipid//Fatty acids and conjugates | 463.3 | 319.2279 | 671.2181087 | 92028.39647 | 146560.5598 | 92596.00538 | 137.106546 | 0.00000459 | 218.3501278 | 0.000000401 | 137.952186 | 0.000208 |
| EPA | MS1 | Lipids and lipid-like molecules | Lipid/Fatty acids and conjugates | 573.7 | 301.2177 | 1383602.455 | 6333637.06 | 8491900.006 | 5202424.074 | 4.5776 | 0.000204 | 6.1375 | 3.84E-08 | 3.7601 | 0.034806 |
| gamma-Aminobutyric acid (GABA) | MS1 | Organic acids and derivatives | Amino acids, peptides, and analogues | 50.2 | 104.0712 | 6672565.439 | 70604368.52 | 19860143.16 | 73424148.74 | 10.581 | 0.0000253 | 2.9764 | 0.000118 | 11.004 | 0.000000271 |
| 2''-(6''-p-Coumaroylglucosyl)quercitrin | MS1 | Phenylpropanoids and polyketides | Flavonoids | 54.6 | 739.1625 | 268442.0887 | 20495493.84 | 32521972.38 | 12633453.13 | 76.35 | 0.005365 | 121.15 | 0.001663 | 47.062 | 0.04673 |
| Naringenin | MS1 | Phenylpropanoids and polyketides | Flavonoids | 473.7 | 273.2536 | 23831.10588 | 1352953.572 | 559671.1791 | 1273684.187 | 56.773 | 4.48E-05 | 23.485 | 0.000202 | 53.446 | 0.012203 |
| Procyanidin B2 | MS1 | Phenylpropanoids and polyketides | Flavonoids | 602.1 | 561.1267 | 158992.5772 | 9494780.512 | 12203623.19 | 4279431.29 | 59.718 | 0.003617 | 76.756 | 3.69E-09 | 26.91591875 | 0.014730371 |
| Prostaglandin B1 | MS1 | Lipids and lipid-like molecules | Fatty Acyls | 590.8 | 335.2249 | 641983.5552 | 55100518.25 | 62347475.86 | 23471301.39 | 85.829 | 0.000424 | 97.117 | 1.55E-06 | 36.56059598 | 0.00133562 |
| Quercetin | MS1 | Phenylpropanoids and polyketides | Flavonoids | 615.8 | 301.2388 | 5459571.608 | 293557311.3 | 495429405 | 170945890.3 | 53.769 | 7.98E-05 | 90.745 | 1.82E-10 | 31.311 | 0.006955 |
| PC(16:0/10-HDoHE) | MS1 | Lipids and lipid-like molecules |  | 539.2 | 802.5512 | 25,997,497.44 | 1,580,630.34 | 3,795,309.20 | 931,297.60 | 0.060799327 | 0.000305 | 0.145987482 | 0.000423 | 0.035822587 | 0.000273 |
| PE(18:0e/12-HEPE) | MS1 | Lipids and lipid-like molecules |  | 541.7 | 766.5482 | 788,195.00 | 26,543,263.17 | 39,085,155.85 | 13,049,274.32 | 33.676 | 0.003849 | 49.588 | 0.000000177 | 16.55589586 | 0.375686367 |
| PE(18:2e/10-HDoHE) | MS1 | Lipids and lipid-like molecules |  | 538.6 | 788.5358 | 93,389.14 | 3,150,362.11 | 512,155.58 | 7,211,648.68 | 33.73371027 | 0.015442 | 5.484102233 | 0.809360504 | 77.22149343 | 0.000439 |
| PI(18:0/12-HETE) | MS1 | Lipids and lipid-like molecules |  | 543.2 | 902.5326 | 9,506,572.20 | 1,334,956.15 | 2,374,714.73 | 4,684,913.67 | 0.14042 | 0.000385 | 0.2498 | 0.00000259 | 0.49281 | 0.004487 |
| PG(16:0/18:1(9Z)) | MS1 | Lipids and lipid-like molecules |  | 491.9 | 749.539 | 281,252.00 | 87,956.24 | 21,062.17 | 92,661.52 | 0.312731074 | 0.0000322 | 0.074887192 | 8.52E-10 | 0.329460823 | 9.17E-08 |
| PE(18:1(9Z)/0:0) | MS1 | Lipids and lipid-like molecules | Lipid/Glycerophospholipids | 495.1 | 478.2939 | 141395469 | 525289.7927 | 34362421.38 | 755118.2479 | 0.003715 | 9.22E-08 | 0.243023497 | 0.00000159 | 0.005341 | 8.17E-08 |
| 2''-(6''-p-Coumaroylglucosyl)quercitrin | MS1 | Phenylpropanoids and polyketides | Flavonoids | 54.6 | 739.1625 | 268442.0887 | 20495493.84 | 32521972.38 | 12633453.13 | 76.35 | 0.005365 | 121.15 | 0.001663 | 47.062 | 0.04673 |
| Naringenin | MS1 | Phenylpropanoids and polyketides | Flavonoids | 473.7 | 273.2536 | 23831.10588 | 1352953.572 | 559671.1791 | 1273684.187 | 56.773 | 4.48E-05 | 23.485 | 0.000202 | 53.446 | 0.012203 |
| Procyanidin B2 | MS1 | Phenylpropanoids and polyketides | Flavonoids | 602.1 | 561.1267 | 158992.5772 | 9494780.512 | 12203623.19 | 4279431.29 | 59.718 | 0.003617 | 76.756 | 3.69E-09 | 26.91591875 | 0.014730371 |
| Prostaglandin B1 | MS1 | Lipids and lipid-like molecules | Fatty Acyls | 590.8 | 335.2249 | 641983.5552 | 55100518.25 | 62347475.86 | 23471301.39 | 85.829 | 0.000424 | 97.117 | 1.55E-06 | 36.56059598 | 0.00133562 |
| Quercetin | MS1 | Phenylpropanoids and polyketides | Flavonoids | 615.8 | 301.2388 | 5459571.608 | 293557311.3 | 495429405 | 170945890.3 | 53.769 | 7.98E-05 | 90.745 | 1.82E-10 | 31.311 | 0.006955 |
| Delphin | MS1 | Phenylpropanoids and polyketides | Flavonoids | 658.70 | 628.18 | 529,041,825.85 | 14,747,963.32 | 11,716,137.68 | 24,296,757.75 | 0.027877 | 4.45E-07 | 0.022146 | 1.70E-07 | 0.045926 | 3.79E-07 |
| Rosmarinic acid | MS1 | Phenylpropanoids and polyketides | Cinnamic acids and derivatives | 565.30 | 341.31 | 75,291,306.63 | 6,745,017.81 | 5,329,347.69 | 39,716,077.79 | 0.089586 | 9.08E-06 | 0.070783 | 4.16E-07 | 0.527498852 | 0.287776357 |

Pairwise analysis of raw buffalo milk with different fermented buffalo milks using a volcano plot. A false discovery rate-adjusted *p*-value (*q*-value) of < 0.05 and a fold-change in concentration of > 200% increase or decrease represented statistical significance. Milk, raw buffalo milk; PFM, fermented buffalo milk produced with *L. plantarum* B and a traditional yogurt starter; BFM, fermented buffalo milk produced with *L. plantarum* B; TFM, fermented buffalo milk produced with a traditional yogurt starter.
